# Supplementary material for: CircRNA-derived pseudogenes
Source: PubMed Central journal article supplement — Cell Res. 2016 Mar 29;26(6):747–50. doi: 10.1038/cr.2016.42 (PMC4897178; doi:10.1038/cr.2016.42), 2016-03-29
Supplement: cr201642x2.pdf [file cr201642x2.pdf]

# Supplementary Information

(A)

| Pseudogenes with <i>RFWD2</i> origin                |                                                            | Locations                                         | Exon6-Exon2 back-splicing junction | <i>RFWD2</i> exons in pseudogenes | Counts of As in poly(A) |     |
|-----------------------------------------------------|------------------------------------------------------------|---------------------------------------------------|------------------------------------|-----------------------------------|-------------------------|-----|
| Putative <i>circRFWD2</i> -derived pseudogenes (42) | High-confidence <i>circRFWD2</i> -derived pseudogenes (33) | Back-splicing junction sequences $\geq 20$ bp (7) | chr1:117842919-117843301           | exon6(42bp)-exon2(60bp)           | 6,2,3,4,5               | 12  |
|                                                     |                                                            |                                                   | chr1:118040603-118040985           | exon6(42bp)-exon2(60bp)           | 6,2,3,4,5               | 13  |
|                                                     |                                                            |                                                   | chr6:130401556-130401938           | exon6(42bp)-exon2(60bp)           | 6,2,3,4,5               | 12  |
|                                                     |                                                            |                                                   | chr10:126586694-126586843*         | exon6(42bp)-exon2(60bp)           | 6,2,3                   | N/A |
|                                                     |                                                            |                                                   | chr14:15298521-15298904            | exon6(42bp)-exon2(60bp)           | 6,2,3,4,5               | 12  |
|                                                     |                                                            |                                                   | chr15:103804648-103804954          | exon6(42bp)-exon2(60bp)           | 6,2,3,4,5               | 5   |
|                                                     |                                                            |                                                   | chrX:65086804-65087178             | exon6(35bp)-exon2(60bp)           | 6,2,3,4,5               | 13  |
|                                                     | Back-splicing junction sequences $< 20$ bp (26)            | chr1:155766132-155766276*                         | exon6(13bp)-exon2(60bp)            | 6,2,3                             | N/A                     |     |
|                                                     |                                                            | chr2:7631062-7631345                              | exon6(13bp)-exon2(60bp)            | 6,2,3,4,5                         | 7                       |     |
|                                                     |                                                            | chr2:29093836-29094119                            | exon6(13bp)-exon2(60bp)            | 6,2,3,4,5                         | 5                       |     |
|                                                     |                                                            | chr2:34830827-34831109                            | exon6(13bp)-exon2(60bp)            | 6,2,3,4,5                         | 7                       |     |
|                                                     |                                                            | chr3:4504816-4505071                              | exon6(13bp)-exon2(60bp)            | 6,2,3,4,5                         | 4                       |     |
|                                                     |                                                            | chr3:4766084-4766365                              | exon6(13bp)-exon2(60bp)            | 6,2,3,4                           | 10                      |     |
|                                                     |                                                            | chr3:6378332-6378615                              | exon6(11bp)-exon2(60bp)            | 6,2,3,4,5                         | 7                       |     |
|                                                     |                                                            | chr3:155754971-155755247                          | exon6(13bp)-exon2(60bp)            | 6,2,3,4,5                         | 6                       |     |
|                                                     |                                                            | chr4:7763264-7763548                              | exon6(13bp)-exon2(60bp)            | 6,2,3,4,5                         | 5                       |     |
|                                                     |                                                            | chr4:94061360-94061643                            | exon6(13bp)-exon2(60bp)            | 6,2,3,4,5                         | 9                       |     |
|                                                     |                                                            | chr7:28235651-28235934                            | exon6(13bp)-exon2(60bp)            | 6,2,3,4,5                         | 6                       |     |
|                                                     |                                                            | chr8:29417354-29417637                            | exon6(13bp)-exon2(60bp)            | 6,2,3,4,5                         | 6                       |     |
|                                                     |                                                            | chr10:104874215-104874498                         | exon6(13bp)-exon2(60bp)            | 6,2,3,4,5                         | 8                       |     |
|                                                     |                                                            | chr12:94731107-9473390                            | exon6(13bp)-exon2(60bp)            | 6,2,3,4,5                         | 6                       |     |
|                                                     |                                                            | chr14:19263202-19263485                           | exon6(13bp)-exon2(60bp)            | 6,2,3,4,5                         | 7                       |     |
|                                                     |                                                            | chr14:116729593-116729876                         | exon6(13bp)-exon2(60bp)            | 6,2,3,4,5                         | 7                       |     |
|                                                     |                                                            | chr15:3953006-3953272                             | exon6(13bp)-exon2(60bp)            | 6,2,3,4,5                         | 4                       |     |
|                                                     |                                                            | chr15:5714020-5714303                             | exon6(13bp)-exon2(60bp)            | 6,2,3,4,5                         | 7                       |     |
|                                                     |                                                            | chr15:13713972-13714255                           | exon6(13bp)-exon2(60bp)            | 6,2,3,4,5                         | 9                       |     |
|                                                     |                                                            | chr15:14142938-14143221                           | exon6(13bp)-exon2(60bp)            | 6,2,3,4,5                         | 7                       |     |
|                                                     |                                                            | chr18:7844684-7844949                             | exon6(13bp)-exon2(60bp)            | 6,2,3,4,5                         | 7                       |     |
|                                                     |                                                            | chr18:11752288-11752571                           | exon6(13bp)-exon2(60bp)            | 6,2,3,4,5                         | 17                      |     |
|                                                     |                                                            | chrX:75705395-75705678                            | exon6(13bp)-exon2(60bp)            | 6,2,3,4,5                         | 7                       |     |
|                                                     |                                                            | chrX:95467664-95467947                            | exon6(13bp)-exon2(60bp)            | 6,2,3,4,5                         | 6                       |     |
|                                                     |                                                            | chrX:114662183-114662466                          | exon6(13bp)-exon2(60bp)            | 6,2,3,4,5                         | 5                       |     |
|                                                     |                                                            | chrY:1277313-1277596**                            | exon6(13bp)-exon2(60bp)            | 6,2,3,4,5                         | 6                       |     |
|                                                     | Low-confidence <i>circRFWD2</i> -derived pseudogenes (9)   | chr1:105321124-105321442                          | No                                 | 2,3,4,5                           | 3                       |     |
|                                                     |                                                            | chr2:22762744-22763077                            | No                                 | 2,3,4,5                           | 3                       |     |
|                                                     |                                                            | chr2:45329232-45329465*                           | No                                 | 2,3,4                             | N/A                     |     |
|                                                     |                                                            | chr2:96133443-96133643                            | No                                 | 2,3,4,5                           | 6                       |     |
|                                                     |                                                            | chr5:6358836-6359147                              | No                                 | 2,3,4,5                           | 6                       |     |
|                                                     |                                                            | chr6:14570771-14571041                            | No                                 | 2,3,4,5                           | 6                       |     |
|                                                     |                                                            | chr10:3303049-3303381                             | No                                 | 2,3,4,5                           | 3                       |     |
|                                                     |                                                            | chr10:82442603-82442943                           | No                                 | 2,3,4,5                           | 4                       |     |
|                                                     |                                                            | chr17:57115121-57115447                           | No                                 | 2,3,4,5                           | 3                       |     |
| Linear <i>RFWD2</i> mRNA-derived pseudogenes (6)    | chr3:98846063-98846502                                     | No                                                | 19,20                              | 36                                |                         |     |
|                                                     | chr6:41010910-41011386                                     | No                                                | 18,19,20                           | 34                                |                         |     |
|                                                     | chr6:120005990-120006346                                   | No                                                | 17,18,19,20                        | 7                                 |                         |     |
|                                                     | chr6:131431440-131433959                                   | No                                                | 1-20                               | 44                                |                         |     |
|                                                     | chr9:32629139-32629479                                     | No                                                | 15,16,17                           | 19                                |                         |     |
|                                                     | chrX:103162834-103165519                                   | No                                                | 1-20                               | 31                                |                         |     |

## (B)

| Locations in mouse genome | CircRNA exons | Pseudogene exons | Origin genes  | Isoforms           | Other linear RNA related pseudogenes (and their genomic locations)                                                       |
|---------------------------|---------------|------------------|---------------|--------------------|--------------------------------------------------------------------------------------------------------------------------|
| chr1:77570670-77570963    | 8-10          | 8-10             | TASP1         | NM_001159640       | No                                                                                                                       |
| chr1:140047780-140048277  | 2-3           | 2-3              | ZFP532        | NM_207255          | No                                                                                                                       |
| chr2:21244101-21244441    | 4-5           | 4-5              | PHF3          | ENSMUST00000088310 | No                                                                                                                       |
| chr2:37671940-37673005    | 2-3           | 2-3              | ZFP609        | NM_172536          | No                                                                                                                       |
| chr2:131109585-131109796  | 7-21          | 20               | FUBP1         | uc008rsz.1         | No                                                                                                                       |
| chr4:18193525-18193754    | 2-5           | 2                | ZFP652        | ENSMUST00000107717 | No                                                                                                                       |
| chr4:131902790-131903312  | 3-10          | 7-10             | PIK3CB        | uc012gyy.1         | No                                                                                                                       |
| chr5:88423213-88423556    | 3-7           | 3-5              | SEMA3A        | ENSMUST00000095012 | No                                                                                                                       |
| chr6:58135885-58136125    | 19-20         | 19               | CNTNAP2       | ENSMUST00000114641 | No                                                                                                                       |
| chr6:58512271-58512511    | 19-20         | 19               | CNTNAP2       | ENSMUST00000114641 | No                                                                                                                       |
| chr6:76284389-76284927    | 2-9           | 2-8              | UXS1          | ENSMUST00000126008 | Yes (exon1-15: chr17:73189666-73191698)                                                                                  |
| chr6:89200701-89201079    | 3-12          | 7-9              | BRD1          | NM_001033274       | No                                                                                                                       |
| chr6:119425237-119425605  | 17-20         | 17-19            | NCOR1         | ENSMUST00000101066 | No                                                                                                                       |
| chr6:146463331-146463607  | 3-5           | 3-5              | CALM2         | NM_007589          | Yes (exon1-6: chr6:127281468-127282571)                                                                                  |
| chr7:14616386-14616789    | 19-20         | 20               | RANBP2        | NM_011240          | No                                                                                                                       |
| chr7:14756551-14756926    | 19-20         | 20               | RANBP2        | NM_011240          | No                                                                                                                       |
| chr7:14857028-14857340    | 19-20         | 20               | RANBP2        | NM_011240          | No                                                                                                                       |
| chr7:15118005-15118384    | 19-20         | 20               | RANBP2        | NM_011240          | No                                                                                                                       |
| chr7:15369748-15370129    | 19-20         | 20               | RANBP2        | NM_011240          | No                                                                                                                       |
| chr7:15408517-15408905    | 19-20         | 20               | RANBP2        | NM_011240          | No                                                                                                                       |
| chr7:15528046-15528427    | 19-20         | 20               | RANBP2        | NM_011240          | No                                                                                                                       |
| chr7:15566483-15566871    | 19-20         | 20               | RANBP2        | NM_011240          | No                                                                                                                       |
| chr7:15725924-15726312    | 19-20         | 20               | RANBP2        | NM_011240          | No                                                                                                                       |
| chr7:15766810-15767202    | 19-20         | 20               | RANBP2        | NM_011240          | No                                                                                                                       |
| chr7:84804224-84805343    | 2-5           | 2-4              | PNPLA8        | NM_026164          | No                                                                                                                       |
| chr7:84883579-84884648    | 2-5           | 2-4              | PNPLA8        | NM_026164          | No                                                                                                                       |
| chr8:112938148-112938513  | 3-7           | 4-7              | GMDS          | ENSMUST00000041859 | Yes (exon5-10: chrX:155922915-155923428)                                                                                 |
| chr8:122683600-122683840  | 3-9           | 4-6              | ACTR3         | ENSMUST00000027579 | Yes (exon1-11: chrX:81820383-81822920)                                                                                   |
| chr9:40929907-40930428    | 2-4           | 4                | USP10         | ENSMUST00000144458 | Yes (exon1-14: chr1:45768280-45770200)                                                                                   |
| chr9:48420165-48420581    | 3-8           | 8                | NXPE4         | uc009phu.2         | No                                                                                                                       |
| chr9:75061357-75062048    | 2-7           | 2-7              | API5          | ENSMUST00000028617 | Yes (exon1-7: chr3:90758659-90759563)                                                                                    |
| chr9:96810275-96810687    | 2-4           | 2-4              | D17WSU92E     | NM_001044719       | No                                                                                                                       |
| chr10:60228055-60228859   | 2             | 2                | HECA          | uc007elw.1         | No                                                                                                                       |
| chr11:45280589-45280955   | 7-11          | 8-11             | TYW1          | ENSMUST00000040213 | No                                                                                                                       |
| chr11:80423966-80424340   | 8-10          | 8-10             | DLGAP4        | NM_146128          | No                                                                                                                       |
| chr12:39948444-39949116   | 2-32          | 17-20            | USP9X         | NM_009481          | No                                                                                                                       |
| chr13:13275132-13275791   | 3-11          | 6-11             | ROCK1         | ENSMUST00000067947 | No                                                                                                                       |
| chr13:76439327-76439666   | 8-22          | 17-19            | ACAP2         | ENSMUST00000058033 | No                                                                                                                       |
| chr13:85865048-85865333   | 5-9           | 6-9              | SFPQ          | NM_023603          | No                                                                                                                       |
| chr14:19035803-19036355   | 3-8           | 4-7              | GTF2A1        | NM_031391          | Yes (exon1-9: chr12:82491520-82496623/<br>chr5:134353719-134356615)/<br>chr11:8804984-8806936/chrX:<br>20382438-20383891 |
| chr14:25809631-25809873   | 3-4           | 3-4              | HMBOX1        | uc007uip.1         | No                                                                                                                       |
| chr14:114492243-114492559 | 2-5           | 2                | PNPLA8        | NM_026164          | Yes (exon2-4: chr7:84804225-84805343)                                                                                    |
| chr16:27843370-27844421   | 2-10          | 6-10             | ZFP106        | ENSMUST00000055241 | No                                                                                                                       |
| chr16:70747479-70747721   | 3-5           | 3-5              | TAF1B         | uc007nej.2         | No                                                                                                                       |
| chr17:19422496-19422803   | 2-17          | 13-15            | SMC2          | NM_001301412       | No                                                                                                                       |
| chr17:55063411-55063913   | 2-5           | 2                | 4933411K20RIK | ENSMUST00000110376 | No                                                                                                                       |
| chr18:25321983-25322217   | 24-25         | 25               | SMARCA2       | ENSMUST00000025862 | No                                                                                                                       |
| chrX:53418329-53418967    | 2-10          | 5-9              | CSNK1G3       | NM_146128          | No                                                                                                                       |

(C)

| Locations in human genome | CircRNA exons | Pseudogene exons | Origin genes | Isoforms        | Other linear RNA related pseudogenes                                                                                                         |
|---------------------------|---------------|------------------|--------------|-----------------|----------------------------------------------------------------------------------------------------------------------------------------------|
| chr1:16314674-16314961    | 11-15         | 12               | CPD          | ENST00000225719 | No                                                                                                                                           |
| chr1:223741976-223742921  | 2             | 2                | NACC2        | NM_144653       | No                                                                                                                                           |
| chr1:238090130-238090890  | 2-5           | 2-4              | ACTG1        | NM_001199954    | Yes (exon2-6: chr1:104112105-104114008/<br>chr1:202842360-202844336/chr20:1141153-1143045/<br>chrY:19868177-19870002/chrY:20309773-20311598) |
| chr1:246691881-246692140  | 11-15         | 12               | CPD          | ENST00000225719 | No                                                                                                                                           |
| chr2:159559606-159559995  | 3-4           | 3-4              | NCOA6        | ENST00000374796 | No                                                                                                                                           |
| chr7:39899233-39899892    | 2             | 2                | LOC650226    | NR_029420       | No                                                                                                                                           |
| chr11:21191294-21191683   | 3             | 3                | KIAA1462     | ENST00000375377 | Yes (exon2-3: chr21:40897453-40901708)                                                                                                       |
| chr11:34764451-34764745   | 7-10          | 8-10             | ARHGAP26     | ENST00000274498 | No                                                                                                                                           |
| chr11:41681595-41681772   | 4-7           | 6                | DDB2         | ENST00000256996 | No                                                                                                                                           |
| chr13:25091882-25092180   | 2-8           | 4                | CENPJ        | NM_018451       | No                                                                                                                                           |
| chr13:34836998-34837211   | 4-5           | 4                | KIAA1551     | ENST00000312561 | No                                                                                                                                           |
| chr13:77564462-77564724   | 25-27         | 25-27            | DHX9         | NM_001357       | Yes (exon1-28: chr13:77558898-77563104)                                                                                                      |
| chr14:52622457-52622894   | 11-18         | 12-15            | ITGA3        | NM_002204       | No                                                                                                                                           |
| chr14:71498397-71498687   | 4-9           | 4-6              | TTC7B        | ENST00000555005 | No                                                                                                                                           |
| chr15:34701760-34702795   | 4             | 4                | APBA2        | ENST00000561069 | No                                                                                                                                           |
| chr15:34847982-34849017   | 4             | 4                | APBA2        | ENST00000561069 | No                                                                                                                                           |
| chr16:87500741-87501671   | 2             | 2                | NR3C1        | NM_000176       | No                                                                                                                                           |
| chr17:26004849-26005113   | 11-15         | 12               | CPD          | ENST00000225719 | No                                                                                                                                           |
| chr17:30330126-30330344   | 2-3           | 3                | BPTF         | ENST00000544778 | No                                                                                                                                           |
| chr17:30423862-30424085   | 2-3           | 3                | BPTF         | ENST00000544778 | No                                                                                                                                           |
| chr19:23437948-23438238   | 10-26         | 21-23            | IPO5         | NM_002271       | Yes (exon6-28: chr9:6012290-6015582)                                                                                                         |
| chr20:10869230-10869738   | 10-11         | 10               | FAT1         | NM_005245       | No                                                                                                                                           |
| chrX:118072118-118073108  | 2-6           | 2-6              | COBL         | ENST00000265136 | No                                                                                                                                           |
| chrY:13299925-13300166    | 6-7           | 7                | AC097374.2   | ENST00000582835 | No                                                                                                                                           |

**Table S1. List of circRNA-derived pseudogenes in mouse and human.**

**(A) List of mouse *RFWD2* related pseudogenes.** At least 42 pseudogenes were identified to have the putative *circRFWD2* origin, and other six with a linear *RFWD2* mRNA origin. The sub-classification, genomic locations, non-colinear exon-exon back-splicing junction sequence length, exon composition and counts of “A”s in UCSC poly(A) information are listed. Although most have been annotated, all these *circRFWD2*-derived pseudogenes were not marked with circRNA origin. \*, three

*circRFWD2*-derived pseudogenes were not previously annotated as pseudogenes. \*\*, not identified in all the examined mouse strains, possible due to its location on Y chromosome.

**(B) Annotation of low-confidence circRNA-derived pseudogenes in mouse.** In total, at least 48 low-confidence circRNA-derived pseudogenes were identified without related non-colinear exon-exon junctions in the mouse reference genome (mm10). The genomic locations, exon compositions in both related circRNAs and pseudogenes, related gene origins and isoforms, and the existence of linear mRNA-derived pseudogenes from the same gene origin is listed. Note that the genomic loci of related linear mRNA-derived pseudogenes (last column) are different from the low-confidence circRNA-derived pseudogenes.

**(C) Annotation of low-confidence circRNA-derived pseudogenes in human.** In total, at least 24 low-confidence circRNA-derived pseudogenes were identified without related non-colinear exon-exon junctions in the human reference genome (hg19). The genomic locations, exon compositions in both related circRNAs and pseudogenes, related gene origins and isoforms, and the existence of the related linear mRNA-derived pseudogenes is listed. Note that the genomic loci of the related linear mRNA-derived pseudogenes (last column) are different from the low-confidence circRNA-derived pseudogenes.
